# Supplementary material
Source: bioRxiv or medRxiv preprint supplement (https://www.biorxiv.org/content/biorxiv/early/2019/12/02/862243/DC5/embed/media-5.pdf)
Supplement: Supplementary file [file media-5.pdf]

**Table S5**

| MA    | coverage > 3 |         |         |          | posteriorMax >=0.99 |         |         |          |
|-------|--------------|---------|---------|----------|---------------------|---------|---------|----------|
|       | AIIC         | CG      | CHG     | CHH      | AIIC                | CG      | CHG     | CHH      |
| MA1_1 | 13417233     | 2344610 | 2513665 | 8558958  | 23428047            | 3030753 | 3797292 | 16600002 |
| MA1_3 | 25009841     | 3450911 | 3937253 | 20731677 | 29141823            | 3753716 | 4183152 | 21204955 |
| MA3   | 25679815     | 3086050 | 3542387 | 19051378 | 24357974            | 3655356 | 4131622 | 16570996 |

Previous methods  
MethylStar

**Table S5:** Pre-processing of WGBS data using MethylStar increases the number of high-confident cytosines that can be used for epimutation analysis compared with previous pre-processing approaches.
